# Supplementary material
Source: HighWire-hosted journal article supplement (https://bmjopen.bmj.com/content/7/9/e017979)
Supplement: inline-supplementary-material-1 [file inline-supplementary-material-1.pdf]

## Supplementary Appendix 1

### Ovid MEDLINE Search Strategy

1. Dermatitis, Atopic/

2. exp Eczema/

3. (eczem\* or atopic dermatit\*).mp. [mp=title, abstract, original title, name of substance word, subject heading word, keyword heading word, protocol supplementary concept word, rare disease supplementary concept word, unique identifier, synonyms]

4. or/1-3

5. intracranial embolism/

6. exp Intracranial Hemorrhages/

7. exp Intracranial Arterial Diseases/

8. exp Brain Ischemia/

9. (intracranial embolism\* or intracranial h?emorrhage\* or intracranial arterial disease\* or intracranial thrombos\* or stroke\* or cerebrovascular accident\* or cerebrovascular diseas\* or cva or cerebral artery diseas\* or brain isch\* or brain infarct\* or brain h?emorrhag\* or occlusive cerebrovascular disease\*).mp. [mp=title, abstract, original title, name of substance word, subject heading word, keyword heading word, protocol supplementary concept word, rare disease supplementary concept word, unique identifier, synonyms]

10. exp Cardiovascular Diseases/

11. (myocardial isch?emia\* or heart arrest\* or heart attack\* or myocardial infarct\* or acute coronary syndrome\* or angina\* or isch?emic heart diseas\* or coronary arter\* or heart fail\* or congestive cardiac fail\* or ccf or lvf or left ventricular fail\* or rvf or right ventricular fail\* or heart right ventricle fail\* or heart left ventricle fail\* or af or cardiovascular diseas\* or heart diseas\* or vascular diseas\* or arrhythmia\* or abnormal heart rhythm\* or atrial flutter\* or heart block\* or svt\* or supraventricular tachycardia\* or bundle branch block\*).mp. [mp=title, abstract, original title, name of substance word, subject heading word, keyword heading word, protocol supplementary concept word, rare disease supplementary concept word, unique identifier, synonyms]

12. exp Myocardial Revascularization/

13. exp Percutaneous Coronary Intervention/

14. (myocardial revasculari?ation\* or percutaneous coronary intervention\* or heart muscle revasculari?ation\* or coronary revasculari?ation\* or percutaneous transluminal angioplast\* or coronary artery obstruction\* or transluminal coronary angioplast\* or coronary artery surger\* or interventional cardiovascular procedure\*).mp. [mp=title, abstract, original title, name of substance word, subject heading word, keyword heading word, protocol supplementary concept word, rare disease supplementary concept word, unique identifier, synonyms]

15. (cardiac arrest\* or heart death\* or card\* death\* or (cardiovascular adj3 mortalit\*)).mp. [mp=title, abstract, original title, name of substance word, subject heading word, keyword heading word, protocol supplementary concept word, rare disease supplementary concept word, unique identifier, synonyms]

16. or/5-15

17. 4 and 16
